# Supplementary material
Source: PubMed Central journal article supplement (PMC6113533)
Supplement: mmc1.pdf [file mmc1.pdf]

## Supplemental Materials

### Cardiac Myosin Binding Protein-C Autoantibodies are Potential Early Indicators of Cardiac Dysfunction and Patient Outcome in Acute Coronary Syndrome

#### Brief Title: cMyBP-C Autoantibodies in Cardiovascular Disease

Thomas L. Lynch IV, PHD,<sup>a</sup> Diederik W.D. Kuster, PHD,<sup>a</sup> Beverly Gonzalez, ScM,<sup>b</sup> Neelam Balasubramanian, BA,<sup>b</sup> Nandini Nair, MD, PHD,<sup>c</sup> Sharlene Day, PHD,<sup>d</sup> Jenna E. Calvino, BA,<sup>e</sup> Yanli Tan, RN,<sup>f</sup> Christoph Liebetrau, MD,<sup>g</sup> Christian Troidl, PhD,<sup>g</sup> Christian W. Hamm, MD,<sup>g</sup> Ahmet Güçlü, MD,<sup>h</sup> Barbara McDonough, RN,<sup>i</sup> Ali J. Marian, MD,<sup>f</sup> Jolanda van der Velden, PhD,<sup>j</sup> Christine E. Seidman, MD,<sup>i</sup> Gordon S. Huggins, MD,<sup>e</sup> and Sakthivel Sadayappan, PHD<sup>a</sup>

<sup>a</sup>Department of Cell and Molecular Physiology and <sup>b</sup>Clinical Research Office, Health Sciences Division, Loyola University Chicago, Maywood, IL 60153, USA; <sup>c</sup>Division of Cardiology, Scott and White Hospital, Texas A&M HSC College of Medicine, Temple, TX 76508, USA; <sup>d</sup>Hypertrophic Cardiomyopathy Clinic, Department of Internal Medicine, University of Michigan, Ann Arbor, MI 48109-5644, USA; <sup>e</sup>Molecular Cardiology Research Institute, Center for Translational Genomics, Department of Medicine, Cardiology Division, Tufts Medical Center, Boston, MA 02111, USA; <sup>f</sup>Center for Cardiovascular Genetics, Institute of Molecular Medicine, Department of Medicine, University of Texas Health Sciences Center at Houston and Texas Heart Institute, Houston, TX 77030, USA; <sup>g</sup>Kerckhoff Heart and Thorax Center, Department of Cardiology, Bad Nauheim, Germany and DZHK (German Centre for Cardiovascular Research), partner site RheinMain, Frankfurt am Main, Germany; <sup>h</sup>Department of Cardiology and <sup>i</sup>Department of Physiology, Institute for Cardiovascular Research, VU University Medical Center, de Boelelaan 1108, 1081 HZ Amsterdam, The Netherlands; <sup>j</sup>Department of Genetics, Harvard Medical School, Boston, MA 02115, USA

**Financial support:** This work was supported by the National Institutes of Health, Bethesda, Maryland [R01 HL130356, R01 HL105826 and K02 HL114749 to S.S.]; John T. Babbitt Foundation, Chatham, New Jersey [to G.S.H]; the Netherlands Organization for Scientific Research, The Netherlands [to J.v.d.V]; the American Heart Association Midwest Postdoctoral Fellowship and Predoctoral Fellowship and the American Heart Association Grant-in-Aid and Cardiovascular Genome-Phenome Study, Dallas, Texas [13POST17220009 to D.W.D.K, 15PRE22430028 to T.L.L.IV, 14GRNT20490025 to S.S., and 15CVGPSD27020012 to S.S.]

**Relationships with industry:** No conflicts of interest in connection with the submitted article exist

**Address for correspondence:** Sakthivel Sadayappan, PhD, MBA. Department of Internal Medicine, Heart, Lung and Vascular Institute, Cardiovascular Center, University of Cincinnati College of Medicine, 231 Albert Sabin Way, Cincinnati, OH 45267-0575, USA; Phone: +1 513-558-7498; FAX: +1 513-558-2884; Email: sadayasl@ucmail.uc.edu

**Supplemental Tables**

| <b>Supplementary Table 1. Clinical and Demographic Characteristics of Donors</b> |               |
|----------------------------------------------------------------------------------|---------------|
| N                                                                                | 141           |
| Gender (N %)                                                                     |               |
| Female                                                                           | 72 (61.01%)   |
| Male                                                                             | 46 (38.98%)   |
| Age (Mean, SD)                                                                   | 37.52 (15.94) |
| Diabetes (N %)                                                                   | 0 (0%)        |
| Hypertension (N %)                                                               | 0 (0%)        |
| LVEF (Mean, SD)                                                                  | 62.70 (3.97)  |

| <b>Supplementary Table 2. Clinical and Demographic Associations Across AAbs to N-terminal-cMyBP-C Peptides for Patients with Dilated Cardiomyopathy</b> |                               |                               |                |
|---------------------------------------------------------------------------------------------------------------------------------------------------------|-------------------------------|-------------------------------|----------------|
|                                                                                                                                                         | <b>C0-C1f-AAb<sup>-</sup></b> | <b>C0-C1f-AAb<sup>+</sup></b> | <b>P-value</b> |
| N                                                                                                                                                       | 71                            | 2                             |                |
| Gender (N %)                                                                                                                                            |                               |                               | 0.41           |
| Female                                                                                                                                                  | 16 (22.54%)                   | 1 (50%)                       |                |
| Male                                                                                                                                                    | 55 (77.46%)                   | 1 (50%)                       |                |
| Age (Median, IQR)                                                                                                                                       | 59 (47 – 68)                  | 56.50 (37 – 76)               | 0.92           |
| NYHA Functional Class (N %)                                                                                                                             |                               |                               | 0.42           |
| I                                                                                                                                                       | 4 (5.71%)                     | 0 (0%)                        |                |
| II                                                                                                                                                      | 13 (18.57%)                   | 0 (0%)                        |                |
| III                                                                                                                                                     | 42 (60%)                      | 1 (50%)                       |                |
| IV                                                                                                                                                      | 11 (15.71%)                   | 1 (50%)                       |                |
| LVEF (Median, IQR)                                                                                                                                      | 25 (20 – 30)                  | 20 (15 – 25)                  | 0.33           |
|                                                                                                                                                         | <b>C0-C3-AAb<sup>-</sup></b>  | <b>C0-C3-AAb<sup>+</sup></b>  | <b>P-value</b> |
| N                                                                                                                                                       | 70                            | 3                             |                |
| Gender (N %)                                                                                                                                            |                               |                               | 0.55           |
| Female                                                                                                                                                  | 16 (22.86%)                   | 1 (33.33%)                    |                |
| Male                                                                                                                                                    | 54 (77.14%)                   | 2 (66.67%)                    |                |
| Age (Median, IQR)                                                                                                                                       | 59 (47 – 68)                  | 53 (37 – 76)                  | 0.87           |
| NYHA Functional Class (N %)                                                                                                                             |                               |                               | 0.59           |
| I                                                                                                                                                       | 4 (5.80%)                     | 0 (0%)                        |                |
| II                                                                                                                                                      | 13 (18.84%)                   | 0 (0%)                        |                |
| III                                                                                                                                                     | 41 (59.42%)                   | 2 (66.67%)                    |                |
| IV                                                                                                                                                      | 11 (15.94%)                   | 1 (33.33%)                    |                |
| LVEF (Median, IQR)                                                                                                                                      | 25 (20 – 30)                  | 25 (15 – 28)                  | 0.59           |
|                                                                                                                                                         | <b>C3-C6-AAb<sup>-</sup></b>  | <b>C3-C6-AAb<sup>+</sup></b>  |                |
| N                                                                                                                                                       | 63                            | 10                            |                |
| Gender (N %)                                                                                                                                            |                               |                               | 0.99           |
| Female                                                                                                                                                  | 15 (23.81%)                   | 2 (20%)                       |                |
| Male                                                                                                                                                    | 48 (76.19%)                   | 8 (80%)                       |                |
| Age (Median, IQR)                                                                                                                                       | 59 (50 – 69)                  | 52.50 (40 – 66)               | 0.43           |
| NYHA Functional Class (N %)                                                                                                                             |                               |                               | 0.06           |
| I                                                                                                                                                       | 4 (6.45%)                     | 0 (0%)                        |                |
| II                                                                                                                                                      | 9 (14.52%)                    | 4 (40%)                       |                |
| III                                                                                                                                                     | 40 (64.52%)                   | 3 (30%)                       |                |
| IV                                                                                                                                                      | 9 (14.52%)                    | 3 (30%)                       |                |
| LVEF (Median, IQR)                                                                                                                                      | 25 (20 – 30)                  | 25.50 (20 – 29)               | 0.84           |

\* From Wilcoxon Rank-Sum Test Statistic, Chi-Square Test, or Fisher's Exact Test when appropriate

| <b>Supplementary Table 3. Clinical and Demographic Associations Across AAbs to C-terminal-cMyBP-C Peptides and FL-cMyBP-C for Patients with Dilated Cardiomyopathy</b> |                                   |                                   |                |
|------------------------------------------------------------------------------------------------------------------------------------------------------------------------|-----------------------------------|-----------------------------------|----------------|
|                                                                                                                                                                        | <b>C6-C8-AAb<sup>-</sup></b>      | <b>C6-C8-AAb<sup>+</sup></b>      | <b>P-value</b> |
| N                                                                                                                                                                      | 72                                | 1                                 |                |
| Gender (N %)                                                                                                                                                           |                                   |                                   | 0.23           |
| Female                                                                                                                                                                 | 16 (22.22%)                       | 1 (100%)                          |                |
| Male                                                                                                                                                                   | 56 (77.78%)                       | 0 (0%)                            |                |
| Age (Median, IQR)                                                                                                                                                      | 59 (47 – 67.50)                   | 76 (76 – 76)                      | 0.13           |
| NYHA Functional Class (N %)                                                                                                                                            |                                   |                                   | 0.22           |
| I                                                                                                                                                                      | 4 (5.63%)                         | 0 (0%)                            |                |
| II                                                                                                                                                                     | 13 (18.31%)                       | 0 (0%)                            |                |
| III                                                                                                                                                                    | 43 (60.56%)                       | 0 (0%)                            |                |
| IV                                                                                                                                                                     | 11 (15.49%)                       | 1 (100%)                          |                |
| LVEF (Median, IQR)                                                                                                                                                     | 25 (20 – 30)                      | 25 (25 – 25)                      | 0.98           |
|                                                                                                                                                                        | <b>C8-C10-AAb<sup>-</sup></b>     | <b>C8-C10-AAb<sup>+</sup></b>     |                |
| N                                                                                                                                                                      | 48                                | 25                                |                |
| Gender (N %)                                                                                                                                                           |                                   |                                   | 0.49           |
| Female                                                                                                                                                                 | 10 (20.83%)                       | 7 (28%)                           |                |
| Male                                                                                                                                                                   | 38 (79.17%)                       | 18 (72%)                          |                |
| Age (Median, IQR)                                                                                                                                                      | 58 (47 – 70)                      | 59 (51 – 66)                      | 0.92           |
| NYHA Functional Class (N %)                                                                                                                                            |                                   |                                   | 0.32           |
| I                                                                                                                                                                      | 3 (6.38%)                         | 1 (4%)                            |                |
| II                                                                                                                                                                     | 6 (12.77%)                        | 7 (28%)                           |                |
| III                                                                                                                                                                    | 31 (65.96%)                       | 12 (48%)                          |                |
| IV                                                                                                                                                                     | 7 (14.89%)                        | 5 (20%)                           |                |
| LVEF (Median, IQR)                                                                                                                                                     | 25 (20 – 30)                      | 25 (20 – 29)                      | 0.96           |
|                                                                                                                                                                        | <b>FL-cMyBP-C-AAb<sup>-</sup></b> | <b>FL-cMyBP-C-AAb<sup>+</sup></b> |                |
| N                                                                                                                                                                      | 62                                | 11                                |                |
| Gender (N %)                                                                                                                                                           |                                   |                                   | 0.71           |
| Female                                                                                                                                                                 | 14 (22.58%)                       | 3 (27.27%)                        |                |
| Male                                                                                                                                                                   | 48 (77.42%)                       | 8 (72.73%)                        |                |
| Age (Median, IQR)                                                                                                                                                      | 59.50 (51 – 69)                   | 51 (38 – 66)                      | 0.20           |
| NYHA Functional Class (N %)                                                                                                                                            |                                   |                                   | 0.12           |
| I                                                                                                                                                                      | 3 (4.92%)                         | 1 (9.09%)                         |                |
| II                                                                                                                                                                     | 9 (14.75%)                        | 4 (36.36%)                        |                |
| III                                                                                                                                                                    | 37 (60.66%)                       | 6 (54.55%)                        |                |
| IV                                                                                                                                                                     | 12 (19.67%)                       | 0 (0%)                            |                |
| LVEF (Median, IQR)                                                                                                                                                     | 25 (20 – 30)                      | 20 (15 – 29)                      | 0.30           |

\*From Wilcoxon Rank-Sum Test Statistic, Chi-Square Test, or Fisher's Exact Test when appropriate

| <b>Supplementary Table 4. Clinical and Demographic Associations Across AAbs to N-terminal-cMyBP-C Peptides for Patients with Hypertrophic Cardiomyopathy</b> |                               |                               |                |
|--------------------------------------------------------------------------------------------------------------------------------------------------------------|-------------------------------|-------------------------------|----------------|
|                                                                                                                                                              | <b>C0-C1f-AAb<sup>-</sup></b> | <b>C0-C1f-AAb<sup>+</sup></b> | <b>P-value</b> |
| N                                                                                                                                                            | 211                           | 3                             |                |
| Gender (N %)                                                                                                                                                 |                               |                               | 0.99           |
| Female                                                                                                                                                       | 88 (41.71%)                   | 1 (33.33%)                    |                |
| Male                                                                                                                                                         | 123 (58.29%)                  | 2 (66.67%)                    |                |
| Age (Median, IQR)                                                                                                                                            | 54 (42 – 65)                  | 52 (45 - 58)                  | 0.81           |
| NYHA Functional Class (N %)                                                                                                                                  |                               |                               | 0.15           |
| I                                                                                                                                                            | 99 (48.06%)                   | 0 (0%)                        |                |
| II                                                                                                                                                           | 57 (27.67%)                   | 2 (66.67%)                    |                |
| III                                                                                                                                                          | 49 (23.79%)                   | 1 (33.33%)                    |                |
| IV                                                                                                                                                           | 1 (0.49%)                     | 0 (0%)                        |                |
| LVEF (Median, IQR)                                                                                                                                           | 65 (60 – 70)                  | 65 (45 – 70)                  | 0.54           |
|                                                                                                                                                              | <b>C0-C3-AAb<sup>-</sup></b>  | <b>C0-C3-AAb<sup>+</sup></b>  | <b>P-value</b> |
| N                                                                                                                                                            | 212                           | 2                             |                |
| Gender (N %)                                                                                                                                                 |                               |                               | 0.51           |
| Female                                                                                                                                                       | 89 (41.98%)                   | 0 (0%)                        |                |
| Male                                                                                                                                                         | 123 (58.02%)                  | 2 (100%)                      |                |
| Age (Median, IQR)                                                                                                                                            | 53.50 (42.03 – 65)            | 51.50 (45 – 58)               | 0.84           |
| NYHA Functional Class (N %)                                                                                                                                  |                               |                               | 0.28           |
| I                                                                                                                                                            | 99 (47.83%)                   | 0 (0%)                        |                |
| II                                                                                                                                                           | 58 (28.02%)                   | 1 (50%)                       |                |
| III                                                                                                                                                          | 49 (23.67%)                   | 1 (50%)                       |                |
| IV                                                                                                                                                           | 1 (0.48%)                     | 0 (0%)                        |                |
| LVEF (Median, IQR)                                                                                                                                           | 65 (60.05 – 70)               | 57.50 (45 – 70)               | 0.57           |
|                                                                                                                                                              | <b>C3-C6-AAb<sup>-</sup></b>  | <b>C3-C6-AAb<sup>+</sup></b>  |                |
| N                                                                                                                                                            | 190                           | 24                            |                |
| Gender (N %)                                                                                                                                                 |                               |                               | 0.67           |
| Female                                                                                                                                                       | 80 (42.11%)                   | 9 (37.50%)                    |                |
| Male                                                                                                                                                         | 110 (57.89%)                  | 15 (62.50%)                   |                |
| Age (Median, IQR)                                                                                                                                            | 54.77 (42.06 – 65)            | 47 (42.50 – 62)               | 0.35           |
| NYHA Functional Class (N %)                                                                                                                                  |                               |                               | 0.09           |
| I                                                                                                                                                            | 93 (49.73%)                   | 6 (27.27%)                    |                |
| II                                                                                                                                                           | 48 (25.67%)                   | 11 (50%)                      |                |
| III                                                                                                                                                          | 45 (24.06%)                   | 5 (22.73%)                    |                |
| IV                                                                                                                                                           | 1 (0.53%)                     | 0 (0%)                        |                |
| LVEF (Median, IQR)                                                                                                                                           | 65 (60 – 70)                  | 67.95 (60.50 – 71.25)         | 0.33           |

\* From Wilcoxon Rank-Sum Test Statistic, Chi-Square Test, or Fisher's Exact Test when appropriate

| <b>Supplementary Table 5. Clinical and Demographic Associations Across AAbs to C-terminal-cMyBP-C Peptides and FL-cMyBP-C for Patients with Hypertrophic Cardiomyopathy</b> |                                   |                                   |                |
|-----------------------------------------------------------------------------------------------------------------------------------------------------------------------------|-----------------------------------|-----------------------------------|----------------|
|                                                                                                                                                                             | <b>C6-C8-AAb<sup>-</sup></b>      | <b>C6-C8-AAb<sup>+</sup></b>      | <b>P-value</b> |
| N                                                                                                                                                                           | 204                               | 10                                |                |
| Gender (N %)                                                                                                                                                                |                                   |                                   | 0.20           |
| Female                                                                                                                                                                      | 87 (42.65%)                       | 2 (20%)                           |                |
| Male                                                                                                                                                                        | 117 (57.35%)                      | 8 (80%)                           |                |
| Age (Median, IQR)                                                                                                                                                           | 54 (42.67 – 65)                   | 45 (28 – 58)                      | 0.29           |
| NYHA Functional Class (N %)                                                                                                                                                 |                                   |                                   | 0.52           |
| I                                                                                                                                                                           | 96 (48.24%)                       | 3 (30%)                           |                |
| II                                                                                                                                                                          | 55 (27.64%)                       | 4 (40%)                           |                |
| III                                                                                                                                                                         | 47 (23.62%)                       | 3 (30%)                           |                |
| IV                                                                                                                                                                          | 1 (0.50%)                         | 0 (0%)                            |                |
| LVEF (Median, IQR)                                                                                                                                                          | 65 (60 – 70)                      | 72.50 (66.15 – 75)                | <b>0.04</b>    |
|                                                                                                                                                                             | <b>C8-C10-AAb<sup>-</sup></b>     | <b>C8-C10-AAb<sup>+</sup></b>     | <b>P-value</b> |
| N                                                                                                                                                                           | 136                               | 78                                |                |
| Gender (N %)                                                                                                                                                                |                                   |                                   | 0.30           |
| Female                                                                                                                                                                      | 53 (38.97%)                       | 36 (46.15%)                       |                |
| Male                                                                                                                                                                        | 83 (61.03%)                       | 42 (53.85%)                       |                |
| Age (Mean, SD)                                                                                                                                                              | 51.53 (16.95)                     | 54.67 (13.96)                     | 0.17           |
| NYHA Functional Class (N %)                                                                                                                                                 |                                   |                                   | 0.14           |
| I                                                                                                                                                                           | 69 (51.49%)                       | 30 (40%)                          |                |
| II                                                                                                                                                                          | 38 (28.36%)                       | 21 (28%)                          |                |
| III                                                                                                                                                                         | 26 (19.40%)                       | 24 (32%)                          |                |
| IV                                                                                                                                                                          | 1 (0.75%)                         | 0 (0%)                            |                |
| LVEF (Mean, SD)                                                                                                                                                             | 65.70 (7.80)                      | 64.85 (8.40)                      | 0.48           |
|                                                                                                                                                                             | <b>FL-cMyBP-C-AAb<sup>-</sup></b> | <b>FL-cMyBP-C-AAb<sup>+</sup></b> |                |
| N                                                                                                                                                                           | 206                               | 8                                 |                |
| Gender (N %)                                                                                                                                                                |                                   |                                   | 0.72           |
| Female                                                                                                                                                                      | 85 (41.26%)                       | 4 (50%)                           |                |
| Male                                                                                                                                                                        | 121 (58.74%)                      | 4 (50%)                           |                |
| Age (Median, IQR)                                                                                                                                                           | 54 (42.06 – 65)                   | 50 (41.50 – 70.26)                | 0.82           |
| NYHA Functional Class (N %)                                                                                                                                                 |                                   |                                   | 0.56           |
| I                                                                                                                                                                           | 97 (48.02%)                       | 2 (28.57%)                        |                |
| II                                                                                                                                                                          | 56 (27.72%)                       | 3 (42.86%)                        |                |
| III                                                                                                                                                                         | 48 (23.76%)                       | 2 (28.57%)                        |                |
| IV                                                                                                                                                                          | 1 (0.50%)                         | 0 (0%)                            |                |
| LVEF (Median, IQR)                                                                                                                                                          | 65 (60.10 – 70)                   | 63 (60 – 67.35)                   | 0.24           |

\* From Wilcoxon Rank-Sum Test Statistic, Chi-Square Test, or Fisher's Exact Test when appropriate

| <b>Supplementary Table 6. Clinical and Demographic Associations Across C0-C1f-AAb Status for Patients with Acute Coronary Syndrome (ACS)</b> |                               |                               |                         |
|----------------------------------------------------------------------------------------------------------------------------------------------|-------------------------------|-------------------------------|-------------------------|
|                                                                                                                                              | <b>C0-C1f-AAb<sup>-</sup></b> | <b>C0-C1f-AAb<sup>+</sup></b> | <b>P-value</b>          |
| N                                                                                                                                            | 619                           | 9                             |                         |
| Gender (N %)                                                                                                                                 |                               |                               | 0.12                    |
| Female                                                                                                                                       | 170 (27.46%)                  | 5 (55.56%)                    |                         |
| Male                                                                                                                                         | 449 (72.54%)                  | 4 (44.44%)                    |                         |
| Age (Mean, SD)                                                                                                                               | 65 (55 – 74)                  | 65 (47 – 67)                  | 0.69                    |
| LVEF (Median, IQR)                                                                                                                           | 48 (40 – 55)                  | 45 (41 – 53)                  | 0.94                    |
| ACS (N %)                                                                                                                                    |                               |                               | 0.65                    |
| STEMI                                                                                                                                        | 353 (57.31%)                  | 4 (44.44%)                    |                         |
| NSTEMI                                                                                                                                       | 177 (28.73%)                  | 4 (44.44%)                    |                         |
| Unstable Angina                                                                                                                              | 86 (13.96%)                   | 1 (11.11%)                    |                         |
| Atrial Fibrillation (N %)                                                                                                                    | 20 (3.23%)                    | 0 (0%)                        | 0.99                    |
| Ventricular Fibrillation (N %)                                                                                                               | 10 (1.62%)                    | 0 (0%)                        | 0.99                    |
| Prior AMI (N %)                                                                                                                              | 74 (11.95%)                   | 2 (22.22%)                    | 0.30                    |
| Prior PCI (N %)                                                                                                                              | 78 (12.60%)                   | 1 (11.11%)                    | 0.99                    |
| Prior CABG (N %)                                                                                                                             | 51 (8.24%)                    | 0 (0%)                        | 0.99                    |
| Family History (N %)                                                                                                                         | 118 (19.06%)                  | 1 (11.11%)                    | 0.99                    |
| SBP (Mean, SD)                                                                                                                               | 140 (120 – 155)               | 130 (120 – 140)               | 0.25                    |
| Hypertension (N %)                                                                                                                           | 250 (42.96%)                  | 1 (11.11%)                    | 0.09                    |
| Hypotension (N %)                                                                                                                            | 17 (2.75%)                    | 0 (0%)                        | 0.99                    |
| Diabetes (N %)                                                                                                                               | 131 (21.16%)                  | 0 (0%)                        | 0.22                    |
| Creatinine, mg/dL (Median, IQR)                                                                                                              | 0.91 (0.77 – 1.12)            | 0.87 (0.85 – 0.97)            | 0.80                    |
| BNP Baseline Measure, pg/mL (Median, IQR)                                                                                                    | 130.50 (55.50 – 357.50)       | 91 (49 – 211)                 | 0.47                    |
| BNP Measure on Day 1, pg/mL (Median, IQR)                                                                                                    | 237 (127 – 511)               | 111.50 (44.5– 306)            | 0.15                    |
| CKMB Baseline Measure, ng/mL (Median, IQR)                                                                                                   | 8.97 (3.80 – 36.71)           | 17.13 (2.90– 76.83)           | 0.69                    |
| CKMB Measure on Day 1, ng/mL (Median, IQR)                                                                                                   | 27.79 (5.65 – 73.50)          | 16.72 (11.4 – 29.5)           | 0.67                    |
| CRP, mg/L (Median, IQR)                                                                                                                      | 3.57 (1.55 – 9.79)            | 2.74 (0.86 – 2.86)            | 0.06                    |
| Myoglobin Baseline Measure, ng/mL (Median, IQR)                                                                                              | 130 (60.40 – 387.70)          | 164.7 (100.9 – 499.1)         | 0.49                    |
| Myoglobin Measure on Day 1, ng/mL (Median, IQR)                                                                                              | 89.86 (55.82 – 178.50)        | 55.39 (41.92 – 101.57)        | 0.16                    |
| NTproBNP Baseline Measure, pg/mL (Median, IQR)                                                                                               | 505 (135 – 1,839)             | 106 (61 – 359)                | <b>0.05<sup>‡</sup></b> |
| NTproBNP Measure on Day 1, pg/mL (Median, IQR)                                                                                               | 1,496 (544 – 3,434)           | 342 (75 – 3,637)              | 0.17                    |
| NTproBNP Measure on 6 Months, pg/mL (Median, IQR)                                                                                            | 258 (98 – 693)                | 498 (389 – 2,426)             | 0.13                    |
| TnI Baseline Measure, ng/mL (Median, IQR)                                                                                                    | 0.54 (0.04 – 3.66)            | 0.95 (0.00 – 2.92)            | 0.79                    |
| TnI Measure on Day 1, ng/mL (Median, IQR)                                                                                                    | 7.69 (0.96 – 26.07)           | 5.22 (0.90 – 8.81)            | 0.31                    |

\*From Wilcoxon Rank Sum Test, Chi-Square Test, or Fisher's Exact Test when appropriate

| <b>Supplementary Table 7. Clinical and Demographic Associations Across C0-C3-AAb Status for Patients with Acute Coronary Syndrome (ACS)</b> |                              |                              |                |
|---------------------------------------------------------------------------------------------------------------------------------------------|------------------------------|------------------------------|----------------|
|                                                                                                                                             | <b>C0-C3-AAb<sup>-</sup></b> | <b>C0-C3-AAb<sup>+</sup></b> | <b>P-value</b> |
| N                                                                                                                                           | 628                          | 0                            |                |
| Gender (N %)                                                                                                                                |                              |                              |                |
| Female                                                                                                                                      | 175 (27.87%)                 |                              |                |
| Male                                                                                                                                        | 453 (72.13%)                 |                              |                |
| Age (Mean, SD)                                                                                                                              | 63.61 (13.04)                |                              |                |
| LVEF (Mean, SD)                                                                                                                             | 47.12 (11.37)                |                              |                |
| ACS (N %)                                                                                                                                   |                              |                              |                |
| STEMI                                                                                                                                       | 357 (57.12%)                 |                              |                |
| NSTEMI                                                                                                                                      | 181 (28.96%)                 |                              |                |
| Unstable Angina                                                                                                                             | 87 (13.92%)                  |                              |                |
| Atrial Fibrillation (N %)                                                                                                                   | 20 (3.18%)                   |                              |                |
| Ventricular Fibrillation (N %)                                                                                                              | 10 (1.59%)                   |                              |                |
| Prior AMI (N %)                                                                                                                             | 76 (12.10%)                  |                              |                |
| Prior PCI (N %)                                                                                                                             | 79 (12.58%)                  |                              |                |
| Prior CABG (N %)                                                                                                                            | 51 (8.12%)                   |                              |                |
| Family History (N %)                                                                                                                        | 119 (18.95%)                 |                              |                |
| SBP (Mean, SD)                                                                                                                              | 137.42 (28.09)               |                              |                |
| Hypertension (N %)                                                                                                                          | 251 (42.47%)                 |                              |                |
| Hypotension (N %)                                                                                                                           | 17 (2.71%)                   |                              |                |
| Diabetes (N %)                                                                                                                              | 131 (20.86%)                 |                              |                |
| Creatinine, mg/dL (Mean, SD)                                                                                                                | 1.03 (0.72)                  |                              |                |
| BNP Baseline Measure, pg/mL (Mean, SD)                                                                                                      | 344.85 (576.93)              |                              |                |
| BNP Measure on Day 1, pg/mL (Mean, SD)                                                                                                      | 444.05 (562.02)              |                              |                |
| CKMB Baseline Measure, ng/mL (Mean, SD)                                                                                                     | 32.75 (57.36)                |                              |                |
| CKMB Measure on Day 1, ng/mL (Mean, SD)                                                                                                     | 64.88 (96.27)                |                              |                |
| CRP, mg/L (Mean, SD)                                                                                                                        | 14.91 (36.19)                |                              |                |
| Myoglobin Baseline Measure, ng/mL (Mean, SD)                                                                                                | 385.13 (626.71)              |                              |                |
| Myoglobin Measure on Day 1, ng/mL (Mean, SD)                                                                                                | 194.24 (342.46)              |                              |                |
| NTproBNP Baseline Measure, pg/mL (Mean, SD)                                                                                                 | 2,110.44 (4,808.45)          |                              |                |
| NTproBNP Measure on Day 1, pg/mL (Mean, SD)                                                                                                 | 3,310.96 (5,334.03)          |                              |                |
| NTproBNP Measure on 6 Months, pg/mL (Mean, SD)                                                                                              | 714.87 (1,692.66)            |                              |                |
| TnI Baseline Measure, ng/mL (Mean, SD)                                                                                                      | 4.08 (8.99)                  |                              |                |
| TnI Measure on Day 1, ng/mL (Mean, SD)                                                                                                      | 15.93 (18.14)                |                              |                |



**Supplementary Table 8. Clinical and Demographic Associations Across C3-C6-AAb Status for Patients with Acute Coronary Syndrome (ACS)**

|                                                | C3-C6-AAb <sup>-</sup> | C3-C6-AAb <sup>+</sup> | <i>P</i> -value   |
|------------------------------------------------|------------------------|------------------------|-------------------|
| N                                              | 453                    | 175                    |                   |
| Gender (N %)                                   |                        |                        | 0.88              |
| Female                                         | 127 (28.04%)           | 48 (27.43%)            |                   |
| Male                                           | 326 (71.96%)           | 127 (72.57%)           |                   |
| Age (Mean, SD)                                 | 63.47 (12.69)          | 63.99 (13.93)          | 0.65              |
| LVEF (Mean, SD)                                | 47.71 (11.43)          | 45.56 (11.08)          | <b>0.05‡</b>      |
| ACS (N %)                                      |                        |                        | <b>&lt;0.0001</b> |
| STEMI                                          | 194 (42.92%)           | 163 (94.22%)           |                   |
| NSTEMI                                         | 175 (38.72%)           | 6 (3.47%)              |                   |
| Unstable Angina (N %)                          | 83 (18.36%)            | 4 (2.31%)              |                   |
| Atrial Fibrillation (N %)                      | 16 (3.53%)             | 4 (2.29%)              | 0.42              |
| Ventricular Fibrillation (N %)                 | 7 (1.55%)              | 3 (1.71%)              | 0.99              |
| Prior AMI (N %)                                | 61 (13.47%)            | 15 (8.57%)             | 0.09              |
| Prior PCI (N %)                                | 64 (14.13%)            | 15 (8.57%)             | 0.06              |
| Prior CABG (N %)                               | 44 (9.71%)             | 7 (4.0%)               | <b>0.02</b>       |
| Family History (N %)                           | 85 (18.76%)            | 34 (19.43%)            | 0.85              |
| SBP (Mean, SD)                                 | 137.77 (28.69)         | 136.51 (26.54)         | 0.62              |
| Hypertension (N %)                             | 188 (44.03%)           | 63 (38.41%)            | 0.22              |
| Hypotension (N %)                              | 15 (3.31%)             | 2 (1.14%)              | 0.17              |
| Diabetes (N %)                                 | 97 (21.41%)            | 34 (19.43%)            | 0.58              |
| Creatinine, mg/dL (Mean, SD)                   | 1.03 (0.67)            | 1.05 (0.82)            | 0.75              |
| BNP Baseline Measure, pg/mL (Mean, SD)         | 347.21 (562.21)        | 338.94 (613.76)        | 0.87              |
| BNP Measure on Day 1, pg/mL (Mean, SD)         | 435.04 (587.24)        | 465.20 (499.23)        | 0.57              |
| CKMB Baseline Measure, ng/mL (Mean, SD)        | 33.38 (60.61)          | 31.16 (48.28)          | 0.66              |
| CKMB Measure on Day 1, ng/mL (Mean, SD)        | 58.01 (91.89)          | 81.77 (104.79)         | <b>0.03</b>       |
| CRP, mg/L (Mean, SD)                           | 14.08 (31.19)          | 17.02 (46.56)          | 0.44              |
| Myoglobin Baseline Measure, ng/mL (Mean, SD)   | 339.57 (566.50)        | 498.36 (745.77)        | <b>0.01</b>       |
| Myoglobin Measure on Day 1, ng/mL (Mean, SD)   | 202.23 (390.32)        | 175.40 (185.83)        | 0.31              |
| NTproBNP Baseline Measure, pg/mL (Mean, SD)    | 2,061.24 (4,741.48)    | 2,232.14 (4,982.37)    | 0.69              |
| NTproBNP Measure on Day 1, pg/mL (Mean, SD)    | 3,076.04 (5,019.07)    | 3,865.17 (5,994.78)    | 0.17              |
| NTproBNP Measure on 6 Months, pg/mL (Mean, SD) | 673.76 (1,849.48)      | 818.92 (1,209.14)      | 0.35              |
| TnI Baseline Measure, ng/mL (Mean, SD)         | 3.73 (8.04)            | 4.96 (11.0)            | 0.18              |
| TnI Measure on Day 1, ng/mL (Mean, SD)         | 13.67 (16.89)          | 21.23 (19.84)          | <b>&lt;0.0001</b> |

\*From Independent Samples T-Test, Chi-Square Test, or Fisher's Exact Test when appropriate

| <b>Supplementary Table 9. Clinical and Demographic Associations Across C6-C8-AAb Status for Patients with Acute Coronary Syndrome (ACS)</b> |                              |                              |                   |
|---------------------------------------------------------------------------------------------------------------------------------------------|------------------------------|------------------------------|-------------------|
|                                                                                                                                             | <b>C6-C8-AAb<sup>-</sup></b> | <b>C6-C8-AAb<sup>+</sup></b> | <b>P-value</b>    |
| N                                                                                                                                           | 533                          | 95                           |                   |
| Gender (N %)                                                                                                                                |                              |                              | <i>0.89</i>       |
| Female                                                                                                                                      | 148 (27.77%)                 | 27 (28.42%)                  |                   |
| Male                                                                                                                                        | 385 (72.23%)                 | 68 (71.58%)                  |                   |
| Age (Mean, SD)                                                                                                                              | 63.85 (12.86)                | 62.26 (13.99)                | <i>0.27</i>       |
| LVEF (Mean, SD)                                                                                                                             | 47.84 (11.27)                | 42.86 (11.03)                | <b>0.0003</b>     |
| ACS (N %)                                                                                                                                   |                              |                              | <b>&lt;0.0001</b> |
| STEMI                                                                                                                                       | 275 (51.69%)                 | 82 (88.17%)                  |                   |
| NSTEMI                                                                                                                                      | 175 (32.89%)                 | 6 (6.45%)                    |                   |
| Unstable Angina                                                                                                                             | 82 (15.41%)                  | 5 (5.38%)                    |                   |
| Atrial Fibrillation (N %)                                                                                                                   | 18 (3.38%)                   | 2 (2.11%)                    | <i>0.75</i>       |
| Ventricular Fibrillation (N %)                                                                                                              | 8 (1.50%)                    | 2 (2.11%)                    | <i>0.65</i>       |
| Prior AMI (N %)                                                                                                                             | 71 (13.32%)                  | 5 (5.26%)                    | <b>0.03</b>       |
| Prior PCI (N %)                                                                                                                             | 72 (13.51%)                  | 7 (7.37%)                    | <i>0.09</i>       |
| Prior CABG (N %)                                                                                                                            | 46 (8.63%)                   | 5 (5.26%)                    | <i>0.27</i>       |
| Family History (N %)                                                                                                                        | 100 (18.76%)                 | 19 (20%)                     | <i>0.78</i>       |
| SBP (Mean, SD)                                                                                                                              | 138.36 (28)                  | 132.17 (28.16)               | <b>0.05‡</b>      |
| Hypertension (N %)                                                                                                                          | 222 (44.31%)                 | 29 (32.22%)                  | <b>0.03</b>       |
| Hypotension (N %)                                                                                                                           | 14 (2.63%)                   | 3 (3.16%)                    | <i>0.73</i>       |
| Diabetes (N %)                                                                                                                              | 115 (21.58%)                 | 16 (16.84%)                  | <i>0.29</i>       |
| Creatinine, mg/dL (Mean, SD)                                                                                                                | 1.03 (0.74)                  | 1.06 (0.56)                  | <i>0.58</i>       |
| BNP Baseline Measure, pg/mL (Mean, SD)                                                                                                      | 333.26 (529.84)              | 408.11 (786.70)              | <i>0.38</i>       |
| BNP Measure on Day 1, pg/mL (Mean, SD)                                                                                                      | 418.79 (531.44)              | 587.79 (698.75)              | <i>0.06</i>       |
| CKMB Baseline Measure, ng/mL (Mean, SD)                                                                                                     | 32.68 (58.25)                | 33.15 (52.30)                | <i>0.95</i>       |
| CKMB Measure on Day 1, ng/mL (Mean, SD)                                                                                                     | 60.33 (92.25)                | 92.07 (114.69)               | <b>0.05‡</b>      |
| CRP, mg/L (Mean, SD)                                                                                                                        | 14.80 (37.06)                | 15.53 (31.16)                | <i>0.84</i>       |
| Myoglobin Baseline Measure, ng/mL (Mean, SD)                                                                                                | 356.21 (598.69)              | 543.54 (746.23)              | <b>0.02</b>       |
| Myoglobin Measure on Day 1, ng/mL (Mean, SD)                                                                                                | 183.28 (335.50)              | 256.94 (376.27)              | <i>0.09</i>       |
| NTproBNP Baseline Measure, pg/mL (Mean, SD)                                                                                                 | 1,890.07 (3,950.36)          | 3,312.87 (7,938.78)          | <i>0.09</i>       |
| NTproBNP Measure on Day 1, pg/mL (Mean, SD)                                                                                                 | 2,966.77 (4,545.86)          | 5,279.11 (8,324.42)          | <b>0.02</b>       |
| NTproBNP Measure on 6 Months, pg/mL (Mean, SD)                                                                                              | 634.51 (1,361.78)            | 1,187.31 (2,945.89)          | <i>0.17</i>       |
| TnI Baseline Measure, ng/mL (Mean, SD)                                                                                                      | 4.03 (8.89)                  | 4.36 (9.62)                  | <i>0.75</i>       |
| TnI Measure on Day 1, ng/mL (Mean, SD)                                                                                                      | 14.81 (17.45)                | 22.31 (20.64)                | <b>0.004</b>      |

\*From Independent Samples T-Test, Chi-Square Test, or Fisher's Exact Test when appropriate

| <b>Supplementary Table 10. Clinical and Demographic Associations Across C8-C10-AAb Status for Patients with Acute Coronary Syndrome (ACS)</b> |                               |                               |                |
|-----------------------------------------------------------------------------------------------------------------------------------------------|-------------------------------|-------------------------------|----------------|
|                                                                                                                                               | <b>C8-C10-AAb<sup>-</sup></b> | <b>C8-C10-AAb<sup>+</sup></b> | <b>P-value</b> |
| N                                                                                                                                             | 251                           | 377                           |                |
| Gender (N %)                                                                                                                                  |                               |                               | <b>0.007</b>   |
| Female                                                                                                                                        | 55 (21.91%)                   | 120 (31.83%)                  |                |
| Male                                                                                                                                          | 196 (78.09%)                  | 257 (68.17%)                  |                |
| Age (Mean, SD)                                                                                                                                | 61.68 (12.74)                 | 64.90 (13.10)                 | <b>0.002</b>   |
| LVEF (Mean, SD)                                                                                                                               | 48.51 (10.74)                 | 46.15 (11.69)                 | <b>0.01</b>    |
| ACS (N %)                                                                                                                                     |                               |                               | <b>0.002</b>   |
| STEMI                                                                                                                                         | 122 (48.80%)                  | 235 (62.67%)                  |                |
| NSTEMI                                                                                                                                        | 89 (35.60%)                   | 92 (24.53%)                   |                |
| Unstable Angina                                                                                                                               | 39 (15.60%)                   | 48 (12.80%)                   |                |
| Atrial Fibrillation (N %)                                                                                                                     | 7 (2.79%)                     | 13 (3.45%)                    | 0.64           |
| Ventricular Fibrillation (N %)                                                                                                                | 2 (0.80%)                     | 8 (2.12%)                     | 0.33           |
| Prior AMI (N %)                                                                                                                               | 31 (12.35%)                   | 45 (11.94%)                   | 0.88           |
| Prior PCI (N %)                                                                                                                               | 36 (14.34%)                   | 43 (11.41%)                   | 0.28           |
| Prior CABG (N %)                                                                                                                              | 20 (7.97%)                    | 31 (8.22%)                    | 0.91           |
| Family History (N %)                                                                                                                          | 53 (21.12%)                   | 66 (17.51%)                   | 0.26           |
| SBP (Mean, SD)                                                                                                                                | 137.43 (27.41)                | 137.41 (28.58)                | 0.99           |
| Hypertension (N %)                                                                                                                            | 103 (43.46%)                  | 148 (41.81%)                  | 0.69           |
| Hypotension (N %)                                                                                                                             | 4 (1.59%)                     | 13 (3.45%)                    | 0.16           |
| Diabetes (N %)                                                                                                                                | 54 (21.51%)                   | 77 (20.42%)                   | 0.76           |
| Creatinine, mg/dL (Mean, SD)                                                                                                                  | 1.02 (0.78)                   | 1.04 (0.67)                   | 0.73           |
| BNP Baseline Measure, pg/mL (Mean, SD)                                                                                                        | 313.16 (542.48)               | 366.06 (598.69)               | 0.27           |
| BNP Measure on Day 1, pg/mL (Mean, SD)                                                                                                        | 379.54 (554.16)               | 486.31 (564.08)               | <b>0.04</b>    |
| CKMB Baseline Measure, ng/mL (Mean, SD)                                                                                                       | 31.48 (60.09)                 | 33.61 (55.52)                 | 0.68           |
| CKMB Measure on Day 1, ng/mL (Mean, SD)                                                                                                       | 67.45 (106.62)                | 63.24 (89.23)                 | 0.68           |
| CRP, mg/L (Mean, SD)                                                                                                                          | 13.97 (33.66)                 | 15.53 (37.81)                 | 0.60           |
| Myoglobin Baseline Measure, ng/mL (Mean, SD)                                                                                                  | 369.59 (633.59)               | 395.53 (622.73)               | 0.62           |
| Myoglobin Measure on Day 1, ng/mL (Mean, SD)                                                                                                  | 191.03 (408.86)               | 196.31 (292.51)               | 0.88           |
| NTproBNP Baseline Measure, pg/mL (Mean, SD)                                                                                                   | 1,655.90 (3,509.65)           | 2,414.32 (5,492.52)           | <b>0.04</b>    |
| NTproBNP Measure on Day 1, pg/mL (Mean, SD)                                                                                                   | 2,395.75 (3,690.51)           | 3,901.11 (6,099.57)           | <b>0.0009</b>  |
| NTproBNP Measure on 6 Months, pg/mL (Mean, SD)                                                                                                | 598.05 (1,691.05)             | 796.39 (1,692.61)             | 0.25           |
| TnI Baseline Measure, ng/mL (Mean, SD)                                                                                                        | 3.99 (9.14)                   | 4.13 (8.91)                   | 0.85           |
| TnI Measure on Day 1, ng/mL (Mean, SD)                                                                                                        | 14.68 (17.64)                 | 16.76 (18.44)                 | 0.22           |

\*From Independent Samples T-Test, Chi-Square Test, or Fisher's Exact Test when appropriate

| <b>Supplementary Table 11. Clinical and Demographic Associations Across FL-cMyBP-C-AAb Status for Patients with Acute Coronary Syndrome (ACS)</b> |                                   |                                   |                |
|---------------------------------------------------------------------------------------------------------------------------------------------------|-----------------------------------|-----------------------------------|----------------|
|                                                                                                                                                   | <b>FL-cMyBP-C-AAb<sup>-</sup></b> | <b>FL-cMyBP-C-AAb<sup>+</sup></b> | <b>P-value</b> |
| N                                                                                                                                                 | 487                               | 141                               |                |
| Gender (N %)                                                                                                                                      |                                   |                                   | 0.32           |
| Female                                                                                                                                            | 131 (26.90%)                      | 44 (31.21%)                       |                |
| Male                                                                                                                                              | 356 (73.10%)                      | 97 (68.79%)                       |                |
| Age (Mean, SD)                                                                                                                                    | 63.13 (13.11)                     | 65.30 (12.70)                     | 0.08           |
| LVEF (Mean, SD)                                                                                                                                   | 47.45 (11.22)                     | 45.95 (11.84)                     | 0.20           |
| ACS (N %)                                                                                                                                         |                                   |                                   | <0.0001        |
| STEMI                                                                                                                                             | 253 (52.27%)                      | 104 (73.76%)                      |                |
| NSTEMI                                                                                                                                            | 156 (32.23%)                      | 25 (17.73%)                       |                |
| Unstable Angina                                                                                                                                   | 75 (15.50%)                       | 12 (8.51%)                        |                |
| Atrial Fibrillation (N %)                                                                                                                         | 18 (3.70%)                        | 2 (1.42%)                         | 0.27           |
| Ventricular Fibrillation (N %)                                                                                                                    | 8 (1.64%)                         | 2 (1.42%)                         | 0.99           |
| Prior AMI (N %)                                                                                                                                   | 62 (12.73%)                       | 14 (9.93%)                        | 0.36           |
| Prior PCI (N %)                                                                                                                                   | 67 (13.76%)                       | 12 (8.51%)                        | 0.09           |
| Prior CABG (N %)                                                                                                                                  | 42 (8.62%)                        | 9 (6.38%)                         | 0.39           |
| Family History (N %)                                                                                                                              | 89 (18.28%)                       | 30 (21.28%)                       | 0.42           |
| SBP (Mean, SD)                                                                                                                                    | 137.46 (28.56)                    | 137.28 (26.48)                    | 0.95           |
| Hypertension (N %)                                                                                                                                | 199 (43.36%)                      | 52 (39.39%)                       | 0.42           |
| Hypotension (N %)                                                                                                                                 | 15 (3.08%)                        | 2 (1.42%)                         | 0.39           |
| Diabetes (N %)                                                                                                                                    | 102 (20.94%)                      | 29 (20.57%)                       | 0.92           |
| Creatinine, mg/dL (Mean, SD)                                                                                                                      | 1.03 (0.67)                       | 1.06 (0.88)                       | 0.71           |
| BNP Baseline Measure, pg/mL (Mean, SD)                                                                                                            | 339.34 (569.03)                   | 363.16 (604.18)                   | 0.67           |
| BNP Measure on Day 1, pg/mL (Mean, SD)                                                                                                            | 435.98 (561.84)                   | 470.55 (564.35)                   | 0.57           |
| CKMB Baseline Measure, ng/mL (Mean, SD)                                                                                                           | 34.78 (61.46)                     | 25.94 (40.17)                     | 0.06           |
| CKMB Measure on Day 1, ng/mL (Mean, SD)                                                                                                           | 67.95 (100.50)                    | 54.52 (79.98)                     | 0.19           |
| CRP, mg/L (Mean, SD)                                                                                                                              | 13.59 (30.18)                     | 19.39 (51.53)                     | 0.21           |
| Myoglobin Baseline Measure, ng/mL (Mean, SD)                                                                                                      | 382.12 (616.11)                   | 395.20 (663.22)                   | 0.83           |
| Myoglobin Measure on Day 1, ng/mL (Mean, SD)                                                                                                      | 197.40 (350.33)                   | 183.83 (316.38)                   | 0.71           |
| NTproBNP Baseline Measure, pg/mL (Mean, SD)                                                                                                       | 2,149.92 (5,089.49)               | 1,978.75 (3,733.88)               | 0.67           |
| NTproBNP Measure on Day 1, pg/mL (Mean, SD)                                                                                                       | 3,236.40 (5,415.98)               | 3,556.79 (5,070.28)               | 0.57           |
| NTproBNP Measure on 6 Months, pg/mL (Mean, SD)                                                                                                    | 646.43 (1,505.83)                 | 925.07 (2,164.18)                 | 0.23           |
| TnI Baseline Measure, ng/mL (Mean, SD)                                                                                                            | 4.05 (8.77)                       | 4.17 (9.73)                       | 0.88           |
| TnI Measure on Day 1, ng/mL (Mean, SD)                                                                                                            | 15.79 (18.08)                     | 16.39 (18.39)                     | 0.76           |

\*From Independent Samples T-Test, Chi-Square Test, or Fisher's Exact Test when appropriate

| <b>Supplementary Table 12. Clinical and Demographic Associations for Patients with Dilated Cardiomyopathy by ELISA Status</b> |                 |                 |                |
|-------------------------------------------------------------------------------------------------------------------------------|-----------------|-----------------|----------------|
|                                                                                                                               | <b>Negative</b> | <b>Positive</b> | <b>P-value</b> |
| N                                                                                                                             | 40              | 33              |                |
| Gender (N %)                                                                                                                  |                 |                 | 0.46           |
| Female                                                                                                                        | 8 (20.00%)      | 9 (27.27%)      |                |
| Male                                                                                                                          | 32 (80.00%)     | 24 (72.73%)     |                |
| Age (Mean, SD)                                                                                                                | 56.98 (15.12)   | 55.78 (14.99)   | 0.73           |
| NYHA Functional Class (N %)                                                                                                   |                 |                 | 0.64           |
| I                                                                                                                             | 2 (5.13%)       | 2 (6.06%)       |                |
| II                                                                                                                            | 5 (12.82%)      | 8 (24.24%)      |                |
| III                                                                                                                           | 25 (64.10%)     | 18 (54.55%)     |                |
| IV                                                                                                                            | 7 (17.95%)      | 5 (15.15%)      |                |
| LVEF (Mean, SD)                                                                                                               | 25.69 (7.75)    | 26.18 (10.48)   | 0.82           |

*\*From Independent Samples T-Test, Chi-Square Test, or Fisher's Exact Test when appropriate; where Positive means positive on at least 1 domain*

| <b>Supplementary Table 13. Clinical and Demographic Associations Across for Patients with Hypertrophic Cardiomyopathy by ELISA Status</b> |                 |                 |                |
|-------------------------------------------------------------------------------------------------------------------------------------------|-----------------|-----------------|----------------|
|                                                                                                                                           | <b>Negative</b> | <b>Positive</b> | <b>P-value</b> |
| N                                                                                                                                         | 120             | 94              |                |
| Gender (N %)                                                                                                                              |                 |                 | 0.28           |
| Female                                                                                                                                    | 46 (38.33%)     | 43 (45.74%)     |                |
| Male                                                                                                                                      | 74 (61.67%)     | 51 (54.26%)     |                |
| Age (Mean, SD)                                                                                                                            | 51.75 (17.19)   | 53.86 (14.24)   | 0.34           |
| NYHA Functional Class (N %)                                                                                                               |                 |                 | 0.22           |
| I                                                                                                                                         | 62 (52.54%)     | 37 (40.66%)     |                |
| II                                                                                                                                        | 31 (26.27%)     | 28 (30.77%)     |                |
| III                                                                                                                                       | 24 (20.34%)     | 26 (28.57%)     |                |
| IV                                                                                                                                        | 1 (0.85%)       | 0 (0%)          |                |
| LVEF (Mean, SD)                                                                                                                           | 64.91 (7.95)    | 65.19 (8.30)    | 0.81           |

*\*From Independent Samples T-Test, Chi-Square Test, or Fisher's Exact Test when appropriate; where Positive means positive on at least 1 domain*

| <b>Supplementary Table 14. Clinical and Demographic Associations for Patients with Acute Coronary Syndrome (ACS) by ELISA Status</b> |                         |                         |                   |
|--------------------------------------------------------------------------------------------------------------------------------------|-------------------------|-------------------------|-------------------|
|                                                                                                                                      | <b>Negative</b>         | <b>Positive</b>         | <b>P-value</b>    |
| N                                                                                                                                    | 174                     | 454                     |                   |
| Gender (N %)                                                                                                                         |                         |                         | <b>0.01</b>       |
| Female                                                                                                                               | 36 (20.69%)             | 139 (30.62%)            |                   |
| Male                                                                                                                                 | 138 (79.31%)            | 315 (69.38%)            |                   |
| Age (Mean, SD)                                                                                                                       | 62.25 (12.75)           | 64.14 (13.13)           | 0.10              |
| LVEF (Mean, SD)                                                                                                                      | 48.91 (10.64)           | 46.40 (11.58)           | <b>0.02</b>       |
| ACS (N %)                                                                                                                            |                         |                         | <b>&lt;0.0001</b> |
| STEMI                                                                                                                                | 63 (36.21%)             | 294 (65.19%)            |                   |
| NSTEMI                                                                                                                               | 75 (43.10%)             | 106 (23.50%)            |                   |
| Unstable Angina                                                                                                                      | 36 (20.69%)             | 51 (11.31%)             |                   |
| Atrial Fibrillation (N %)                                                                                                            | 4 (2.30%)               | 16 (3.52%)              | 0.43              |
| Ventricular Fibrillation (N %)                                                                                                       | 1 (0.57%)               | 9 (1.98%)               | 0.30              |
| Prior AMI (N %)                                                                                                                      | 23 (13.22%)             | 53 (11.67%)             | 0.60              |
| Prior PCI (N %)                                                                                                                      | 27 (15.52%)             | 52 (11.45%)             | 0.17              |
| Prior CABG (N %)                                                                                                                     | 17 (9.77%)              | 34 (7.49%)              | 0.35              |
| Family History of RF (N %)                                                                                                           | 31 (17.82%)             | 88 (19.38%)             | 0.65              |
| SBP (Mean, SD)                                                                                                                       | 139 (28)                | 136 (28)                | 0.24              |
| Hypertension (N %)                                                                                                                   | 78 (47.56%)             | 173 (40.52%)            | 0.12              |
| Hypotension (N %)                                                                                                                    | 4 (2.30%)               | 13 (2.86%)              | 0.99              |
| Diabetes (N %)                                                                                                                       | 43 (24.71%)             | 88 (19.38%)             | 0.15              |
| Creatinine, mg/dL (Median, IQR)                                                                                                      | 0.91 (0.78 – 1.10)      | 0.91 (0.77 – 1.12)      | 0.78              |
| BNP Baseline Measure, pg/mL (Median, IQR)                                                                                            | 111 (51 – 290)          | 147 (56 – 383)          | 0.06              |
| BNP Measure on Day 1, pg/mL (Median, IQR)                                                                                            | 189 (91 – 397)          | 281 (135 – 565)         | <b>0.001</b>      |
| CKMB Baseline Measure, ng/mL (Median, IQR)                                                                                           | 8.04 (3.64 – 32.54)     | 9.68 (3.90 – 37.64)     | 0.52              |
| CKMB Measure on Day 1, ng/mL (Median, IQR)                                                                                           | 13.61 (5.18 – 72.82)    | 31.12 (6.18 – 73.46)    | 0.27              |
| CRP, mg/L (Median, IQR)                                                                                                              | 3.01 (1.40 – 8.78)      | 3.64 (1.59 – 9.99)      | 0.39              |
| Myoglobin Baseline Measure, ng/mL (Median, IQR)                                                                                      | 105.35 (56.25 – 311.55) | 144.15 (63.41 – 420.65) | 0.08              |
| Myoglobin Measure on Day 1, ng/mL (Median, IQR)                                                                                      | 75.98 (52.99 – 133.20)  | 96.83 (57.69 – 193.10)  | <b>0.02</b>       |
| NTproBNP Baseline Measure, pg/mL (Median, IQR)                                                                                       | 332 (116 – 1408)        | 574 (135 – 2104)        | <b>0.04</b>       |
| NTproBNP Measure on Day 1, pg/mL (Median, IQR)                                                                                       | 987 (416 – 2855)        | 1675 (618 – 4009)       | <b>0.002</b>      |
| NTproBNP Measure on 6 Months, pg/mL (Median, IQR)                                                                                    | 217 (97 – 403)          | 312 (98 – 775)          | <b>0.03</b>       |
| TnI Baseline Measure, ng/mL (Median, IQR)                                                                                            | 0.42 (0.03 – 3.54)      | 0.55 (0.05 – 3.71)      | 0.40              |
| TnI Measure on Day 1, ng/mL (Median, IQR)                                                                                            | 5.84 (0.59 – 23.12)     | 8.39 (1.48 – 27.57)     | 0.18              |

\*From Independent Samples T-Test, Wilcoxon Rank-Sum Test, Chi-Square Test, or Fisher's Exact Test when appropriate; where Positive means positive on at least 1 domain

| <b>Supplementary Table 15. Number of Peptides Positive for AAbs on ELISA by Clinical and Demographic Variables for Patients with Dilated Cardiomyopathy</b> |                                             |              |              |              |
|-------------------------------------------------------------------------------------------------------------------------------------------------------------|---------------------------------------------|--------------|--------------|--------------|
|                                                                                                                                                             | <b>Number of Peptides Positive on ELISA</b> |              |              |              |
|                                                                                                                                                             | <b>0</b>                                    | <b>1</b>     | <b>2</b>     | <b>3+</b>    |
| N                                                                                                                                                           | 44                                          | 21           | 6            | 2            |
| Gender (N %)                                                                                                                                                |                                             |              |              |              |
| Female                                                                                                                                                      | 10 (22.73%)                                 | 5 (23.81%)   | 1 (16.67%)   | 1 (50.00%)   |
| Male                                                                                                                                                        | 34 (77.27%)                                 | 16 (76.19%)  | 5 (83.33%)   | 1 (50.00%)   |
| Age (Median, IQR)                                                                                                                                           | 59 (47 – 70)                                | 60 (54 – 68) | 47 (40 – 59) | 57 (37 – 76) |
| NYHA Functional Class                                                                                                                                       |                                             |              |              |              |
| I                                                                                                                                                           | 3 (6.98%)                                   | 1 (4.76%)    | 0 (0%)       | 0 (0%)       |
| II                                                                                                                                                          | 5 (11.63%)                                  | 5 (23.81%)   | 3 (50.00%)   | 0 (0%)       |
| III                                                                                                                                                         | 28 (65.12%)                                 | 13 (61.90%)  | 1 (16.67%)   | 1 (50.00%)   |
| IV                                                                                                                                                          | 7 (16.28%)                                  | 2 (9.52%)    | 2 (33.33%)   | 1 (50.00%)   |
| LVEF (Median, IQR)                                                                                                                                          | 25 (20 – 30)                                | 25 (20 – 35) | 26 (20 – 29) | 20 (15 – 25) |



| <b>Supplementary Table 16: Odds of Decreasing the Number of Peptides Positive for AAbs on ELISA by Clinical and Demographic Variables for Patients with Dilated Cardiomyopathy</b> |                    |                |
|------------------------------------------------------------------------------------------------------------------------------------------------------------------------------------|--------------------|----------------|
|                                                                                                                                                                                    | <b>OR (95% CI)</b> | <b>p-value</b> |
| Gender (Female vs Male)                                                                                                                                                            | 0.91 (0.31 – 2.65) | 0.86           |
| Age                                                                                                                                                                                | 1.01 (0.98 – 1.04) | 0.63           |
| NYHA Functional Class                                                                                                                                                              |                    | 0.24           |
| II vs I                                                                                                                                                                            | 0.20 (0.02 – 2.41) |                |
| III vs I                                                                                                                                                                           | 0.61 (0.06 – 6.55) |                |
| IV vs I                                                                                                                                                                            | 0.33 (0.03 – 4.20) |                |
| LVEF                                                                                                                                                                               | 1.00 (0.95 – 1.05) | 0.95           |

*\*Univariable ordinal logistic regression model, N=73*

| <b>Supplementary Table 17. Number of Peptides Positive for AAbs on ELISA by Clinical and Demographic Variables for Patients with Hypertrophic Cardiomyopathy</b> |                                             |              |              |              |
|------------------------------------------------------------------------------------------------------------------------------------------------------------------|---------------------------------------------|--------------|--------------|--------------|
|                                                                                                                                                                  | <b>Number of Peptides Positive on ELISA</b> |              |              |              |
|                                                                                                                                                                  | <b>0</b>                                    | <b>1</b>     | <b>2</b>     | <b>3+</b>    |
| N                                                                                                                                                                | 121                                         | 75           | 15           | 3            |
| Gender (N %)                                                                                                                                                     |                                             |              |              |              |
| Female                                                                                                                                                           | 47 (38.84%)                                 | 36 (48.00%)  | 6 (40.00%)   | 0            |
| Male                                                                                                                                                             | 74 (61.16%)                                 | 39 (52.00%)  | 9 (60.00%)   | 3 (100%)     |
| Age (Median, IQR)                                                                                                                                                | 53 (40 – 65)                                | 56 (45 – 66) | 50 (42 – 62) | 45 (37 – 58) |
| NYHA Functional Class                                                                                                                                            |                                             |              |              |              |
| I                                                                                                                                                                | 63 (52.94%)                                 | 33 (44.59%)  | 3 (23.08%)   | 0 (0%)       |
| II                                                                                                                                                               | 31 (26.05%)                                 | 20 (27.03%)  | 7 (53.85%)   | 1 (33.33%)   |
| III                                                                                                                                                              | 24 (20.17%)                                 | 21 (28.38%)  | 3 (23.08%)   | 2 (66.67%)   |
| IV                                                                                                                                                               | 1 (0.84%)                                   | 0 (0%)       | 0 (0%)       | 0 (0%)       |
| LVEF (Median, IQR)                                                                                                                                               | 65 (60 – 70)                                | 65 (61 – 70) | 65 (60 – 75) | 66 (45 – 70) |

| <b>Supplementary Table 18: Odds of Decreasing the Number of Peptides Positive for AAbs on ELISA by Clinical and Demographic Variables for Patients with Hypertrophic Cardiomyopathy</b> |                    |                |
|-----------------------------------------------------------------------------------------------------------------------------------------------------------------------------------------|--------------------|----------------|
|                                                                                                                                                                                         | <b>OR (95% CI)</b> | <b>p-value</b> |
| Gender (Female vs Male)                                                                                                                                                                 | 0.84 (0.50 – 1.44) | 0.53           |
| Age                                                                                                                                                                                     | 0.99 (0.98 – 1.01) | 0.47           |
| NYHA Functional Class                                                                                                                                                                   |                    | 0.07           |
| II vs I                                                                                                                                                                                 | 0.56 (0.29 – 1.05) |                |
| III vs I                                                                                                                                                                                | 0.51 (0.26 – 0.99) |                |
| LVEF                                                                                                                                                                                    | 0.97 (0.96 – 1.03) | 0.84           |

*\*Univariable ordinal logistic regression model, N=214, NYHA IV excluded due to low sample size*

| <b>Supplementary Table 19. Number of Peptides Positive for AAbs on ELISA by Clinical and Demographic Variables for Patients with Acute Coronary Syndrome (ACS)</b> |                                             |                 |                 |                 |
|--------------------------------------------------------------------------------------------------------------------------------------------------------------------|---------------------------------------------|-----------------|-----------------|-----------------|
|                                                                                                                                                                    | <b>Number of Peptides Positive on ELISA</b> |                 |                 |                 |
|                                                                                                                                                                    | <b>0</b>                                    | <b>1</b>        | <b>2</b>        | <b>3+</b>       |
| N                                                                                                                                                                  | 202                                         | 245             | 134             | 47              |
| Gender (N %)                                                                                                                                                       |                                             |                 |                 |                 |
| Female                                                                                                                                                             | 46 (22.77%)                                 | 74 (30.20%)     | 40 (29.85%)     | 15 (31.91%)     |
| Male                                                                                                                                                               | 156 (77.23%)                                | 171 (69.80%)    | 94 (70.15%)     | 32 (68.09%)     |
| Age (Mean, SD)                                                                                                                                                     | 62.58 (12.58)                               | 64.07 (12.68)   | 63.72 (14.14)   | 65.38 (13.67)   |
| LVEF (Mean, SD)                                                                                                                                                    | 48.56 (10.80)                               | 47.94 (11.72)   | 44.79 (11.02)   | 42.62 (11.16)   |
| ACS (N %)                                                                                                                                                          |                                             |                 |                 |                 |
| STEMI                                                                                                                                                              | 77 (38.12%)                                 | 119 (48.77%)    | 120 (90.23%)    | 41 (89.13%)     |
| NSTEMI                                                                                                                                                             | 86 (42.57%)                                 | 84 (34.43%)     | 9 (6.77%)       | 2 (4.35%)       |
| Unstable Angina                                                                                                                                                    | 39 (19.31%)                                 | 41 (16.80%)     | 4 (3.01%)       | 3 (6.52%)       |
| Atrial Fibrillation (N %)                                                                                                                                          | 5 (2.48%)                                   | 13 (5.31%)      | 0 (0%)          | 2 (4.26%)       |
| Ventricular Fibrillation (N %)                                                                                                                                     | 1 (0.50%)                                   | 5 (2.04%)       | 4 (2.99%)       | 0 (0%)          |
| Prior AMI (N %)                                                                                                                                                    | 29 (14.36%)                                 | 31 (12.65%)     | 12 (8.96%)      | 4 (8.51%)       |
| Prior PCI (N %)                                                                                                                                                    | 30 (14.85%)                                 | 37 (15.10%)     | 7 (5.22%)       | 5 (10.64%)      |
| Prior CABG (N %)                                                                                                                                                   | 19 (9.41%)                                  | 23 (9.39%)      | 7 (5.22%)       | 2 (4.26%)       |
| Family History of RF (N %)                                                                                                                                         | 39 (19.31%)                                 | 47 (19.18%)     | 26 (19.40%)     | 7 (14.89%)      |
| SBP (Mean, SD)                                                                                                                                                     | 139.34 (27.56)                              | 136.37 (29.09)  | 137.80 (27.62)  | 133.36 (26.63)  |
| Hypertension (N %)                                                                                                                                                 | 90 (47.12%)                                 | 95 (41.48%)     | 52 (40.94%)     | 14 (31.82%)     |
| Hypotension (N %)                                                                                                                                                  | 4 (1.98%)                                   | 9 (3.67%)       | 3 (2.24%)       | 1 (2.13%)       |
| Diabetes (N %)                                                                                                                                                     | 50 (24.75%)                                 | 44 (17.96%)     | 28 (20.90%)     | 9 (19.15%)      |
| Creatinine, mg/dL (Mean, SD)                                                                                                                                       | 1.04 (0.86)                                 | 1.00 (0.44)     | 1.05 (0.91)     | 1.10 (0.57)     |
| BNP Baseline Measure, pg/mL (Mean, SD)                                                                                                                             | 322.92 (558.85)                             | 337.30 (490.10) | 376.92 (662.18) | 382.50 (774.43) |
| BNP Measure on Day 1, pg/mL (Mean, SD)                                                                                                                             | 381.86 (573.19)                             | 440.88 (518.93) | 491.12 (608.78) | 580.97 (554.60) |
| CKMB Baseline Measure, ng/mL (Mean, SD)                                                                                                                            | 32.82 (64.09)                               | 32.36 (56.89)   | 33.67 (48.15)   | 31.91 (55.34)   |
| CKMB Measure on Day 1, ng/mL (Mean, SD)                                                                                                                            | 63.64 (103.60)                              | 51.58 (78.76)   | 82.63 (107.32)  | 84.89 (103.18)  |
| CRP, mg/L (Mean, SD)                                                                                                                                               | 13.49 (33.97)                               | 14.72 (28.93)   | 17.64 (50.64)   | 14.08 (28.87)   |
| Myoglobin Baseline Measure, ng/mL (Mean, SD)                                                                                                                       | 311.91 (540.80)                             | 371.52 (620.54) | 455.99 (681.40) | 556.61 (779.78) |
| Myoglobin Measure on Day 1, ng/mL (Mean, SD)                                                                                                                       | 194.28 (441.85)                             | 182.95 (281.59) | 213.75 (319.61) | 190.33 (175.16) |
| NTproBNP Baseline Measure, pg/mL (Mean, SD)                                                                                                                        | 1719 (3746)                                 | 1927 (3778)     | 2703 (6643)     | 2961 (6685)     |
| NTproBNP Measure on Day 1, pg/mL (Mean, SD)                                                                                                                        | 2351 (3336)                                 | 3118 (4753)     | 4397 (7287)     | 5000 (6885)     |
| NTproBNP Measure on 6 Months, pg/mL (Mean, SD)                                                                                                                     | 629 (1857)                                  | 589 (885)       | 895 (2435)      | 1240 (1649)     |
| TnI Baseline Measure, ng/mL (Mean, SD)                                                                                                                             | 3.47 (7.64)                                 | 4.25 (9.34)     | 4.76 (10.28)    | 3.86 (8.68)     |
| TnI Measure on Day 1, ng/mL (Mean, SD)                                                                                                                             | 14.18 (17.50)                               | 12.78 (16.06)   | 20.61 (19.22)   | 24.66 (21.90)   |

| <b>Supplementary Table 20: Odds of Decreasing the Number of Peptides Positive for AAbs on ELISA by Clinical and Demographic Variables for Patients with Acute Coronary Syndrome (ACS)</b> |                       |                   |
|-------------------------------------------------------------------------------------------------------------------------------------------------------------------------------------------|-----------------------|-------------------|
|                                                                                                                                                                                           | <b>OR (95% CI)</b>    | <b>p-value</b>    |
| Gender (Female vs Male)                                                                                                                                                                   | 0.76 (0.55 – 1.04)    | 0.09              |
| Age                                                                                                                                                                                       | 0.99 (0.98 – 1.00)    | 0.19              |
| LVEF                                                                                                                                                                                      | 1.02 (1.01 – 1.04)    | <b>0.0008</b>     |
| ACS <sup>‡</sup>                                                                                                                                                                          |                       | <b>&lt;.0001</b>  |
| Unstable Angina vs STEMI, 1 peptide                                                                                                                                                       | 0.68 (0.40 – 1.15)    | 0.15              |
| Unstable Angina vs STEMI, 2 peptides                                                                                                                                                      | 0.07 (0.02 – 0.19)    | <b>&lt;0.0001</b> |
| Unstable Angina vs STEMI, 3+ peptides                                                                                                                                                     | 0.14 (0.04 – 0.50)    | <b>0.002</b>      |
| NSTEMI vs STEMI, 1 peptide                                                                                                                                                                | 0.63 (0.42 – 0.96)    | <b>0.03</b>       |
| NSTEMI vs STEMI, 2 peptides                                                                                                                                                               | 0.07 (0.03 – 0.14)    | <b>&lt;0.0001</b> |
| NSTEMI vs STEMI, 3+ peptides                                                                                                                                                              | 0.04 (0.01 – 0.19)    | <b>&lt;0.0001</b> |
| Atrial Fibrillation <sup>†‡</sup>                                                                                                                                                         |                       | 0.06              |
| 1 peptide                                                                                                                                                                                 | 2.21 (0.77 – 6.30)    |                   |
| 2+ peptides                                                                                                                                                                               | 0.44 (0.08 – 2.30)    |                   |
| Ventricular Fibrillation                                                                                                                                                                  | 0.56 (0.18 – 1.73)    | 0.31              |
| Prior AMI                                                                                                                                                                                 | 1.44 (0.92 – 2.24)    | 0.11              |
| Prior PCI <sup>†</sup>                                                                                                                                                                    | 1.64 (1.06 – 2.55)    | <b>0.03</b>       |
| Prior CABG                                                                                                                                                                                | 1.49 (0.88 – 2.54)    | 0.14              |
| Family History of RF                                                                                                                                                                      | 1.07 (0.74 – 1.54)    | 0.73              |
| SBP                                                                                                                                                                                       | 1.00 (1.00 – 1.01)    | 0.30              |
| Hypertension                                                                                                                                                                              | 1.31 (0.97 – 1.77)    | 0.08              |
| Hypotension                                                                                                                                                                               | 0.93 (0.38 – 2.23)    | 0.86              |
| Diabetes                                                                                                                                                                                  | 1.23 (0.87 – 1.75)    | 0.25              |
| Creatinine                                                                                                                                                                                | 0.96 (0.78 – 1.17)    | 0.67              |
| BNP Baseline Measure, 100 pg/mL                                                                                                                                                           | 0.987 (0.963 – 1.013) | 0.32              |
| BNP Measure on Day 1, 100 pg/mL                                                                                                                                                           | 0.968 (0.940 – 0.997) | <b>0.03</b>       |
| CKMB Baseline Measure, ng/mL                                                                                                                                                              | 1.00 (1.00 – 1.00)    | 0.97              |
| CKMB Measure on Day 1, ng/mL                                                                                                                                                              | 1.00 (1.00 – 1.00)    | 0.10              |
| CRP, mg/L                                                                                                                                                                                 | 1.00 (0.99 – 1.00)    | 0.43              |
| Myoglobin Baseline Measure, 100 ng/mL                                                                                                                                                     | 0.968 (0.946 – 0.991) | <b>0.007</b>      |
| Myoglobin Measure on Day 1, 100 ng/mL                                                                                                                                                     | 0.992 (0.946 – 1.041) | 0.75              |
| NTproBNP Baseline Measure, 100 pg/mL                                                                                                                                                      | 0.997 (0.994 – 1.000) | <b>0.03</b>       |
| NTproBNP Measure on Day 1, 100 pg/mL                                                                                                                                                      | 0.995 (0.992 – 0.998) | <b>0.0007</b>     |
| NTproBNP Measure on 6 Months, 100 pg/mL                                                                                                                                                   | 0.990 (0.979 – 1.000) | 0.06              |
| TnI Baseline Measure                                                                                                                                                                      | 0.99 (0.98 – 1.01)    | 0.31              |
| TnI Measure on Day 1 <sup>‡</sup>                                                                                                                                                         |                       | <b>&lt;.0001</b>  |
| 1 peptide                                                                                                                                                                                 | 1.00 (0.98 – 1.01)    | 0.45              |
| 2 peptides                                                                                                                                                                                | 1.02 (1.01 – 1.03)    | <b>0.006</b>      |
| 3+ peptides                                                                                                                                                                               | 1.03 (1.01 – 1.05)    | <b>0.003</b>      |

*\*Univariable ordinal logistic regression model, N=628. †Categories collapsed into 0, 1, 2+. ‡Multinomial logistic regression model because proportional odds assumption violated.*
